# Supplementary material
Source: PubMed Central journal article supplement (PMC2583144)
Supplement: NIHMS55823-supplement-01.pdf [file NIHMS55823-supplement-01.pdf]

## Supporting Material

**Title:** Imino proton exchange rates imply an induced-fit binding mechanism for the VEGF<sub>165</sub>-targeting aptamer, Macugen

**Authors:** Joon-Hwa Lee<sup>1,2</sup>, Fiona Jucker<sup>1</sup>, and Arthur Pardi<sup>1,\*</sup>

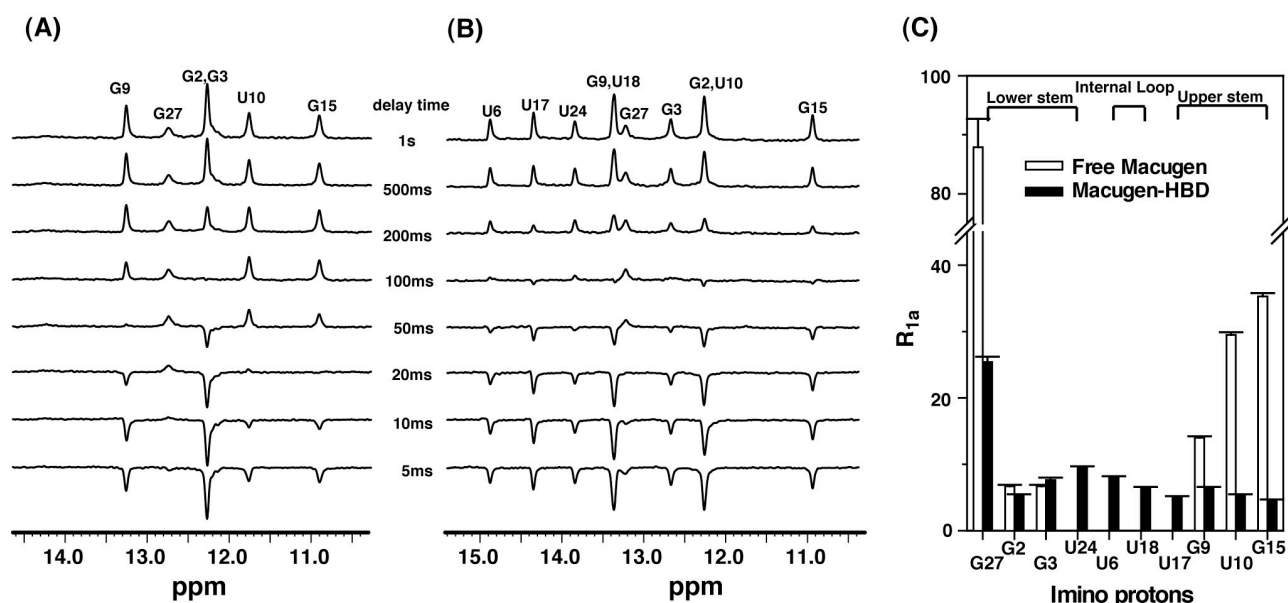

**Figure 5S.** Inversion recovery spectra of imino protons of (A) free Macugen and (B) the HBD-Macugen complex at 15 °C. (C) Apparent  $R_I$  relaxation rates ( $R_{Ia}$ ) of the imino protons in free Macugen (open bars) and the HBD-Macugen complex (filled bars).

**Table 2S:** Apparent relaxation rate constants  $R_{1a}$  of the imino protons of free Macugen and the HBD- and VEGF-Macugen complexes ( $s^{-1}$ )

| Base Pair | Imino proton | Free Macugen          | HBD-Macugen           |                       | VEGF-Macugen      |
|-----------|--------------|-----------------------|-----------------------|-----------------------|-------------------|
|           |              | 15 °C                 | 15 °C                 | 35 °C                 | 35 °C             |
| C1·G27    | G27          | 87.9±4.8              | 25.4±0.8              | n.a. <sup>a</sup>     | n.a. <sup>a</sup> |
| G2·C26    | G2           | ≤6.7±0.2 <sup>b</sup> | ≤5.3±0.2 <sup>c</sup> | ≤3.2±0.1 <sup>c</sup> | n.d. <sup>e</sup> |
| G3·C25    | G3           | ≤6.7±0.2 <sup>b</sup> | 7.6±0.4               | 2.9±0.1               | n.d. <sup>e</sup> |
| A4·U24    | U24          | n.a. <sup>a</sup>     | 9.5±0.2               | 38.4±1.7              | 40.0±5.0          |
|           | U20          | n.a. <sup>a</sup>     | n.a. <sup>a</sup>     | n.a. <sup>a</sup>     | 61.8±3.3          |
| U6·A19    | U6           | n.a. <sup>a</sup>     | 8.0±0.2               | 53.3±2.6              | 50.8±8.9          |
| C7·U18    | U18          | n.a. <sup>a</sup>     | ≤6.3±0.3 <sup>d</sup> | 18.0±0.3 <sup>d</sup> | 19.5±1.0          |
| A8·U17    | U17          | n.a. <sup>a</sup>     | 4.9±0.3               | 2.7±0.1               | n.d. <sup>e</sup> |
| G9·C16    | G9           | 14.0±0.2              | ≤6.3±0.3 <sup>d</sup> | 3.1±0.2 <sup>d</sup>  | n.d. <sup>e</sup> |
| U10·G15   | U10          | 35.3±0.4              | ≤5.3±0.2 <sup>c</sup> | ≤3.2±0.1 <sup>c</sup> | n.d. <sup>e</sup> |
|           | G15          | 29.5±0.5              | 4.4±0.3               | 2.2±0.1               | n.d. <sup>e</sup> |

a) n.a.: no resonance.

b) The G2 and G3 resonances overlap in the free aptamer so the individual  $R_{1a}$  values could not be determined. The intensities fit well to a single exponential and thus only an upper limit for the  $R_{1a}$  of each proton is reported.

c) The G2 and U10 resonances overlap in the HBD- and VEGF-Macugen complexes so the individual  $R_{1a}$  values could not be determined. The intensities fit well to a single exponential and thus only an upper limit for the  $R_{1a}$  of each proton is reported.

d) The G9 and U18 resonances overlap in the HBD- and VEGF-Macugen complexes so the individual  $R_{1a}$  values could not be determined. The intensities fit well to a single exponential and thus only an upper limit for the  $R_{1a}$  of each proton is reported.

e) The  $R_{1a}$  could not be accurately determined because of double exponential relaxation behavior for the large VEGF-Macugen complex.
